# Supplementary material
Source: PubMed Central journal article supplement (PMC11113286)

Suppl Fig 1

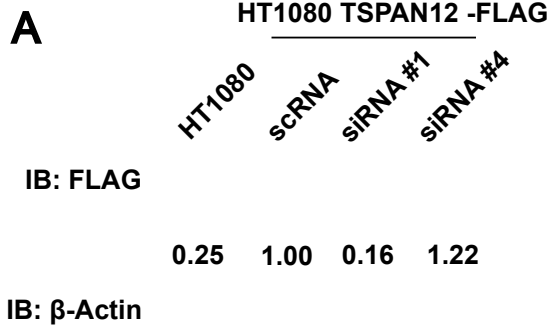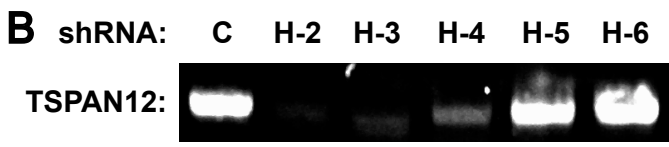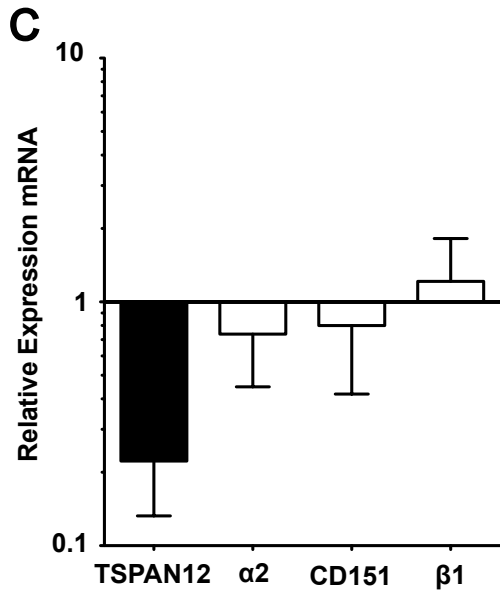

Supplement: 18_2013_1444_MOESM1_ESM.pdf [file 18_2013_1444_MOESM1_ESM.pdf]
